# Supplementary material for: Ruthenium nitrosyl complexes with 1,4,7-trithiacyclononane and 2,2′-bipyridine (bpy) or 2-phenylazopyridine (pap) coligands. Electronic structure and reactivity aspects
Source: Royal Society of Chemistry journal article supplement (doi:10.1039/c1dt10761e), 2011-01-01
Supplement: c1dt10761e.pdf [file c1dt10761e.pdf]

## **Electronic Supplementary Information**

**Ruthenium nitrosyl complexes with 1,4,7-trithiacyclononane and 2,2'-bipyridine (bpy) or 2-phenylazopyridine (pap) coligands. Electronic structure and reactivity aspects**

**Prinaka De,<sup>a</sup> Somnath Maji,<sup>a</sup> Abhishek Dutta Chowdhury,<sup>a</sup> Shaikh M. Mobin,<sup>a</sup> Tapan Kumar Mondal,<sup>b</sup> Alexa Paretzki<sup>c</sup> and Goutam Kumar Lahiri<sup>\*a</sup>**

*<sup>a</sup> Department of Chemistry, Indian Institute of Technology Bombay, Powai, Mumbai 400076, India, E-mail: lahiri@chem.iitb.ac.in*

*<sup>b</sup> Department of Chemistry, Jadavpur University, Jadavpur, Kolkata-700032, India*

*<sup>c</sup> Institut für Anorganische Chemie, Universität Stuttgart, Pfaffenwaldring 55, D-70550 Stuttgart, Germany*

**Table S1** Crystallographic data for  $[\text{Ru}^{\text{II}}([\text{9}]\text{aneS}_3)(\text{bpy})(\text{NO}_2)](\text{ClO}_4)$  [**3**]( $\text{ClO}_4$ ),  
 $[\text{Ru}^{\text{II}}([\text{9}]\text{aneS}_3)(\text{pap})(\text{Cl})](\text{ClO}_4)$  [**5**]( $\text{ClO}_4$ ),  $[\text{Ru}^{\text{II}}([\text{9}]\text{aneS}_3)(\text{pap})(\text{CH}_3\text{CN})](\text{ClO}_4)_2$  [**6**]( $\text{ClO}_4$ )<sub>2</sub>,  
 $[\text{Ru}^{\text{II}}([\text{9}]\text{aneS}_3)(\text{pap})(\text{NO}_2)](\text{ClO}_4)$  [**7**]( $\text{ClO}_4$ )

|                                                  | [ <b>3</b> ]( $\text{ClO}_4$ )                                        | [ <b>5</b> ]( $\text{ClO}_4$ )                                                 | [ <b>6</b> ]( $\text{ClO}_4$ ) <sub>2</sub>                                    | [ <b>7</b> ]( $\text{ClO}_4$ )                                        |
|--------------------------------------------------|-----------------------------------------------------------------------|--------------------------------------------------------------------------------|--------------------------------------------------------------------------------|-----------------------------------------------------------------------|
| Empirical formula                                | $\text{C}_{16}\text{H}_{20}\text{ClN}_3\text{O}_6\text{S}_3\text{Ru}$ | $\text{C}_{17}\text{H}_{21}\text{Cl}_2\text{N}_3\text{O}_4\text{S}_3\text{Ru}$ | $\text{C}_{19}\text{H}_{24}\text{Cl}_2\text{N}_4\text{O}_8\text{S}_3\text{Ru}$ | $\text{C}_{17}\text{H}_{21}\text{ClN}_4\text{O}_6\text{S}_3\text{Ru}$ |
| $M_r$                                            | 583.05                                                                | 599.52                                                                         | 704.57                                                                         | 610.08                                                                |
| Temperature                                      | 150(2) K                                                              | 120(2) K                                                                       | 120(2) K                                                                       | 120(2) K                                                              |
| Crystal symmetry                                 | Monoclinic                                                            | Monoclinic                                                                     | Monoclinic                                                                     | Monoclinic                                                            |
| space group                                      | $P 21/c$                                                              | $C 2/c$                                                                        | $P 21/c$                                                                       | $P 21/c$                                                              |
| $a/\text{\AA}$                                   | 13.9612(3)                                                            | 25.0741(6)                                                                     | 19.033(2)                                                                      | 11.5192(9)                                                            |
| $b/\text{\AA}$                                   | 10.3777(2)                                                            | 11.9072(2)                                                                     | 9.4724(9)                                                                      | 23.074(2)                                                             |
| $c/\text{\AA}$                                   | 13.9987(2)                                                            | 16.1053(3)                                                                     | 15.2998(16)                                                                    | 8.5728(9)                                                             |
| $\alpha/^\circ$                                  | 90                                                                    | 90                                                                             | 90                                                                             | 90                                                                    |
| $\beta/^\circ$                                   | 92.437(2)                                                             | 112.209(3)                                                                     | 111.793(12)                                                                    | 93.618(8)                                                             |
| $\gamma/^\circ$                                  | 90                                                                    | 90                                                                             | 90                                                                             | 90                                                                    |
| $V/\text{\AA}^3$                                 | 2026.37(7)                                                            | 4451.70(15)                                                                    | 2561.2(5)                                                                      | 2274.0(4)                                                             |
| Z                                                | 4                                                                     | 8                                                                              | 4                                                                              | 4                                                                     |
| $D_{\text{calcd}}$ (g $\text{cm}^{-3}$ )         | 1.911                                                                 | 1.789                                                                          | 1.827                                                                          | 1.782                                                                 |
| $\mu$ ( $\text{mm}^{-1}$ )                       | 1.256                                                                 | 1.256                                                                          | 1.119                                                                          | 1.125                                                                 |
| F(000)                                           | 1176                                                                  | 2416                                                                           | 1424                                                                           | 1232                                                                  |
| $2\theta$ range(deg)                             | 7.02 to 49.98                                                         | 6 to 50                                                                        | 5.88 to 50                                                                     | 5.92 to 49.98                                                         |
| Data / restraints / parameters                   | 3567 / 0 / 271                                                        | 3919 / 0 / 271                                                                 | 4504 / 0 / 335                                                                 | 4004 / 0 / 289                                                        |
| GOF                                              | 1.064                                                                 | 1.057                                                                          | 0.941                                                                          | 1.272                                                                 |
| R1, wR2 [ $I > 2\sigma(I)$ ]                     | 0.0182, 0.0475                                                        | 0.0406, 0.1004                                                                 | 0.0501, 0.0899                                                                 | 0.0397, 0.0750                                                        |
| R1, wR2(all data)                                | 0.0203, 0.0481                                                        | 0.0561, 0.1047                                                                 | 0.0936, 0.1006                                                                 | 0.0444, 0.0886                                                        |
| Largest diff. Peak/hole, ( $\text{e \AA}^{-3}$ ) | 0.420, -0.382                                                         | 1.560, -1.434                                                                  | 1.167, -0.732                                                                  | 1.192, -0.977                                                         |

**Table S2** Selected bond distances (Å) and bond angles (°) for [Ru<sup>II</sup>([9]aneS<sub>3</sub>)(bpy)(NO<sub>2</sub>)](ClO<sub>4</sub>) [3](ClO<sub>4</sub>), [Ru<sup>II</sup>([9]aneS<sub>3</sub>)(pap)(Cl)](ClO<sub>4</sub>) [5](ClO<sub>4</sub>), [Ru<sup>II</sup>([9]aneS<sub>3</sub>)(pap)(CH<sub>3</sub>CN)](ClO<sub>4</sub>)<sub>2</sub> [6](ClO<sub>4</sub>)<sub>2</sub>, [Ru<sup>II</sup>([9]aneS<sub>3</sub>)(pap)(NO<sub>2</sub>)](ClO<sub>4</sub>) [7](ClO<sub>4</sub>)

| Distances/angles | [3](ClO <sub>4</sub> )<br>(X=NO <sub>2</sub> ) | [5](ClO <sub>4</sub> )<br>(X=Cl) | [6](ClO <sub>4</sub> ) <sub>2</sub><br>(X=CH <sub>3</sub> CN) | [7](ClO <sub>4</sub> )<br>(X=NO <sub>2</sub> ) |
|------------------|------------------------------------------------|----------------------------------|---------------------------------------------------------------|------------------------------------------------|
| Ru(1)-N(1)       | 2.0823(15)                                     | 2.069(4)                         | 2.073(5)                                                      | 2.066(3)                                       |
| Ru(1)-N(2)       | 2.0875(16)                                     | 1.998(4)                         | 2.030(5)                                                      | 2.037(3)                                       |
| Ru(1)-S(1)       | 2.3084(5)                                      | 2.3402(13)                       | 2.3426(16)                                                    | 2.3353(10)                                     |
| Ru(1)-S(2)       | 2.3012(5)                                      | 2.3308(12)                       | 2.3283(16)                                                    | 2.3298(10)                                     |
| Ru(1)-S(3)       | 2.3435(5)                                      | 2.2980(13)                       | 2.3152(15)                                                    | 2.3404(11)                                     |
| Ru(1)-X          | 2.0605(16)                                     | 2.4055(12)                       | 2.062(5)                                                      | 2.084(4)                                       |
| X-O(1)           | 1.248(2)                                       | -                                | -                                                             | 1.237(4)                                       |
| X-O(2)           | 1.248(2)                                       | -                                | -                                                             | 1.232(5)                                       |
| N(2)-N(3)        | -                                              | 1.287(5)                         | 1.287(6)                                                      | 1.284(5)                                       |
| S(1)-Ru(1)-S(2)  | 87.548(17)                                     | 87.18(4)                         | 87.39(6)                                                      | 87.21(3)                                       |
| S(1)-Ru(1)-S(3)  | 87.984(17)                                     | 88.00(5)                         | 87.62(6)                                                      | 87.75(4)                                       |
| S(2)-Ru(1)-S(3)  | 88.456(16)                                     | 87.92(4)                         | 87.82(6)                                                      | 87.80(4)                                       |
| N(1)-Ru(1)-S(2)  | 174.07(4)                                      | 174.92(11)                       | 173.91(13)                                                    | 174.22(10)                                     |
| N(1)-Ru(1)-N(2)  | 78.17(6)                                       | 75.72(15)                        | 75.52(18)                                                     | 76.25(13)                                      |
| N(1)-Ru(1)-S(1)  | 97.69(4)                                       | 97.40(11)                        | 98.41(13)                                                     | 97.45(9)                                       |
| N(2)-Ru(1)-S(1)  | 175.86(4)                                      | 173.09(11)                       | 173.90(14)                                                    | 173.66(9)                                      |
| N(1)-Ru(1)-S(3)  | 88.97(4)                                       | 94.39(11)                        | 90.53(12)                                                     | 88.94(10)                                      |
| N(2)-Ru(1)-S(2)  | 96.58(4)                                       | 99.72(11)                        | 98.67(13)                                                     | 99.05(9)                                       |
| N(2)-Ru(1)-S(3)  | 91.85(4)                                       | 91.81(11)                        | 91.92(13)                                                     | 91.43(10)                                      |
| N(1)-Ru(1)-X     | 89.90(6)                                       | 88.45(11)                        | 91.46(18)                                                     | 89.66(14)                                      |
| N(2)-Ru(1)-X     | 87.82(6)                                       | 95.27(11)                        | 91.55(18)                                                     | 93.80(13)                                      |
| S(1)-Ru(1)-X     | 92.27(5)                                       | 85.11(5)                         | 89.06(14)                                                     | 86.75(9)                                       |
| S(2)-Ru(1)-X     | 92.66(4)                                       | 89.78(4)                         | 90.51(14)                                                     | 94.05(9)                                       |
| S(3)-Ru(1)-X     | 178.86(4)                                      | 172.84(5)                        | 176.34(14)                                                    | 174.10(9)                                      |
| O(1)-X-O(2)      | 118.47(16)                                     | -                                | -                                                             | 119.8(4)                                       |
| Ru(1)-N(4)-C(18) | -                                              | -                                | 173.5(5)                                                      | -                                              |
| N(4)-C(18)-C(19) | -                                              | -                                | 177.9(6)                                                      | -                                              |

**Table S3** Conformations of coordinated [9]aneS<sub>3</sub> in the crystal structures based on the endocyclic torsion angles around the macrocyclic ring

|                        | <b>3<sup>+</sup></b> | <b>4<sup>3+</sup></b> |
|------------------------|----------------------|-----------------------|
| C(16)-S(1)-C(11)-C(12) | 67.12(15)            | 60.2(5)               |
| S(1)-C(11)-C(12)-S(2)  | 47.97(17)            | 52.7(5)               |
| C(13)-S(2)-C(12)-C(11) | -135.19(14)          | -134.0(4)             |
| C(12)-S(2)-C(13)-C(14) | 64.47(15)            | 63.2(4)               |
| S(2)-C(13)-C(14)-S(3)  | 50.12(17)            | 50.1(5)               |
| C(15)-S(3)-C(14)-C(13) | -134.16(14)          | -132.2(4)             |
| C(14)-S(3)-C(15)-C(16) | 63.89(16)            | 62.7(5)               |
| S(3)-C(15)-C(16)-S(1)  | 48.56(18)            | 52.8(5)               |
| C(11)-S(1)-C(16)-C(15) | -135.15(14)          | -135.1(4)             |

  

|                        | <b>5<sup>+</sup></b> | <b>6<sup>2+</sup></b> | <b>7<sup>+</sup></b> |
|------------------------|----------------------|-----------------------|----------------------|
| C(17)-S(1)-C(12)-C(13) | -66.1(5)             | -67.7(6)              | 64.8(3)              |
| S(1)-C(12)-C(13)-S(2)  | -48.4(5)             | -45.7(7)              | 48.8(4)              |
| C(14)-S(2)-C(13)-C(12) | 135.1(4)             | 130.9(5)              | -134.9(3)            |
| C(13)-S(2)-C(14)-C(15) | -67.0(5)             | -67.1(6)              | 67.4(4)              |
| S(2)-C(14)-C(15)-S(3)  | -46.7(5)             | -49.3(7)              | 45.9(4)              |
| C(16)-S(3)-C(15)-C(14) | 133.5(5)             | 135.8(5)              | -131.0(3)            |
| C(15)-S(3)-C(16)-C(17) | -66.5(4)             | -64.5(5)              | 63.9(4)              |
| S(3)-C(16)-C(17)-S(1)  | -47.1(5)             | -46.9(6)              | 51.4(4)              |
| C(12)-S(1)-C(17)-C(16) | 133.1(4)             | 131.7(5)              | -137.1(3)            |

**Table S4** DFT calculated selective bond distances and bond angles for  $[\text{Ru}^{\text{II}}([\text{9}]\text{aneS}_3)(\text{pap})(\text{NO})]^{3+}$  (**8**<sup>3+</sup>) and  $[\text{Ru}^{\text{II}}([\text{9}]\text{aneS}_3)(\text{pap})(\text{NO})]^{2+}$  (**8**<sup>2+</sup>)

|                 | <b>8</b> <sup>3+</sup> | <b>8</b> <sup>2+</sup> |
|-----------------|------------------------|------------------------|
| Ru(1)-N(1)      | 2.114                  | 2.106                  |
| Ru(1)-N(2)      | 2.162                  | 2.136                  |
| Ru(1)-N(4)      | 1.749                  | 1.911                  |
| Ru(1)-S(1)      | 2.462                  | 2.418                  |
| Ru(1)-S(2)      | 2.454                  | 2.426                  |
| Ru(1)-S(3)      | 2.460                  | 2.449                  |
| N(4)-O(1)       | 1.135                  | 1.165                  |
| N(2)-N(3)       | 1.269                  | 1.270                  |
| N(1)-Ru(1)-N(2) | 75.99                  | 75.59                  |
| N(1)-Ru(1)-N(4) | 94.399                 | 89.19                  |
| N(1)-Ru(1)-S(1) | 96.819                 | 96.80                  |
| N(1)-Ru(1)-S(2) | 170.3                  | 175.9                  |
| N(1)-Ru(1)-S(3) | 85.60                  | 91.23                  |
| N(2)-Ru(1)-N(4) | 94.13                  | 92.29                  |
| N(2)-Ru(1)-S(1) | 168.9                  | 170.9                  |
| N(2)-Ru(1)-S(2) | 100.6                  | 101.4                  |
| N(2)-Ru(1)-S(3) | 85.86                  | 89.08                  |
| N(4)-Ru(1)-S(1) | 94.81                  | 92.40                  |
| N(4)-Ru(1)-S(2) | 94.93                  | 93.65                  |
| N(4)-Ru(1)-S(3) | 180.0                  | 178.6                  |
| S(1)-Ru(1)-S(2) | 85.10                  | 85.98                  |
| S(1)-Ru(1)-S(3) | 85.18                  | 86.24                  |
| S(2)-Ru(1)-S(3) | 85.06                  | 85.99                  |
| Ru(1)-N(4)-O(1) | 179.2                  | 139.4                  |

**Table S5** DFT calculated conformational analysis of **4**<sup>2+</sup> and **8**<sup>2+</sup>

|                                                | <b>4</b> <sup>2+</sup>                     | <b>8</b> <sup>2+</sup>                     |
|------------------------------------------------|--------------------------------------------|--------------------------------------------|
| Optimized                                      | -985.93942540 ( $\theta = 4.45^\circ$ )    | -1079.34692984 ( $\theta = 0.41^\circ$ )   |
| Eclipsed ( $\theta = 0^\circ$ ) <sup>a</sup>   | -985.93904358                              | -1079.34571773                             |
| Staggered ( $\theta = 45^\circ$ ) <sup>a</sup> | -985.93824075                              | -1079.34514831                             |
| $\Delta E$ (optimized-eclipsed) <sup>b</sup>   | -0.2396 kcal/mol (83.8 cm <sup>-1</sup> )  | -0.7606 kcal/mol (266.0 cm <sup>-1</sup> ) |
| $\Delta E$ (optimized-staggered) <sup>b</sup>  | -0.7434 kcal/mol (260.0 cm <sup>-1</sup> ) | -1.1179 kcal/mol (391.0 cm <sup>-1</sup> ) |

<sup>a</sup>Energy in Hartrees.

<sup>b</sup>Energy in kcal/mol and cm<sup>-1</sup>.

**Table S6**  $^1\text{H}$  NMR spectral data in  $\text{CD}_3\text{CN}$

| Complex               | $\delta$ , ppm ( <i>J</i> , Hz) |                                      |
|-----------------------|---------------------------------|--------------------------------------|
|                       | Aromatic protons                | Aliphatic protons                    |
| <b>2<sup>2+</sup></b> | 8.93 (5.2) (d, 2H)              | 3.03-2.89 (4H)                       |
|                       | 8.47 (8.1) (d, 2H)              | 2.84-2.67 (4H)                       |
|                       | 8.20 (8.0, 7.8) (t, 2H)         | 2.62-2.46 (4H)                       |
|                       | 7.67 (6.6) (t, 2H)              | 2.13 (3H) ( $\text{CH}_3\text{CN}$ ) |
| <b>3<sup>+</sup></b>  | 9.00 (5.2) (d, 2H)              | 3.20-3.09 (2H)                       |
|                       | 8.43 (8.0) (d, 2H)              | 2.95-2.85 (2H)                       |
|                       | 8.14 (7.9, 7.8) (t, 2H)         | 2.76-2.63 (4H)                       |
|                       | 7.60 (6.6) (t, 2H)              | 2.60-2.42 (4H)                       |
| <b>4<sup>3+</sup></b> | 8.91 (5.5) (d, 2H)              | 3.95-3.84 (4H)                       |
|                       | 8.75 (8.2) (d, 2H)              | 3.70-3.59 (4H)                       |
|                       | 8.60 (8.0, 7.9) (t, 2H)         | 3.48-3.38 (4H)                       |
|                       | 8.03 (6.7) (t, 2H)              |                                      |
| <b>5<sup>+</sup></b>  | 9.13 (5.4) (d, 1H)              | 3.38-3.14 (4H)                       |
|                       | 8.68 (8.1) (d, 1H)              | 3.10-2.98 (2H)                       |
|                       | 8.25 (7.9) (t, 1H)              | 2.88-2.68 (2H)                       |
|                       | 7.83 (m, 2H)                    | 2.66-2.54 (1H)                       |
|                       | 7.78 (9.0, 6.0) (t, 1H)         | 2.54-2.42 (1H)                       |
|                       | 7.64 (3.9, 2.7) (t, 3H)         | 2.40-2.20 (2H)                       |
| <b>6<sup>2+</sup></b> | 9.09 (5.4) (d, 1H)              | 3.40-3.18 (3H)                       |
|                       | 8.81 (8.1) (d, 1H)              | 3.02-2.86 (2H)                       |
|                       | 8.43 (9.0, 6.0) (t, 1H)         | 2.84-2.72 (2H)                       |
|                       | 7.92 (6.9, 5.4) (t, 1H)         | 2.66-2.44 (3H)                       |
|                       | 7.83 (9.0) (d, 2H)              | 2.42-2.26 (2H)                       |
|                       | 7.72 (m, 3H)                    | 2.23 (3H) ( $\text{CH}_3\text{CN}$ ) |
| <b>7<sup>+</sup></b>  | 9.12 (6.0) (d, 1H)              | 3.44-3.30 (2H)                       |
|                       | 8.77 (6.0) (d, 1H)              | 3.22-3.12 (2H)                       |
|                       | 8.35 (9.0) (t, 1H)              | 3.04-2.92 (1H)                       |
|                       | 7.82 (6.6) (t, 1H)              | 2.82-2.73 (1H)                       |
|                       | 7.76 (m, 2H)                    | 2.62-2.38 (4H)                       |
|                       | 7.66 (m, 3H)                    | 2.36-2.24 (2H)                       |
| <b>8<sup>3+</sup></b> | 9.20 (7.5) (d, 1H)              | 4.04-3.96 (1H)                       |
|                       | 9.13 (5.4) (d, 1H)              | 3.94-3.82 (3H)                       |
|                       | 8.89 (7.8) (t, 1H)              | 3.78-3.60 (4H)                       |
|                       | 8.30 (6.3, 6.0) (t, 1H)         | 3.58-3.46 (1H)                       |
|                       | 8.09 (9.0) (d, 2H)              | 3.42-3.26 (2H)                       |
|                       | 8.00 (7.5, 7.2) (t, 1H)         | 2.82-2.66 (1H)                       |
|                       | 7.85 (8.4, 7.5) (t, 2H)         |                                      |

**Table S7**  $^{13}\text{C}$  NMR spectral data in  $\text{CD}_3\text{CN}$

| Complex               | $\delta$ , ppm   |                   |
|-----------------------|------------------|-------------------|
|                       | Aromatic carbons | Aliphatic carbons |
| <b>3<sup>+</sup></b>  | 157.92           | 33.91             |
|                       | 154.53           | 33.79             |
|                       | 139.61           | 32.82             |
|                       | 128.31           |                   |
|                       | 124.64           |                   |
| <b>4<sup>3+</sup></b> | 157.23           | 40.74             |
|                       | 156.47           | 40.39             |
|                       | 145.83           | 38.56             |
|                       | 131.95           |                   |
|                       | 127.95           |                   |
| <b>7<sup>+</sup></b>  | 166.36           | 36.87             |
|                       | 157.99           | 36.30             |
|                       | 152.68           | 34.67             |
|                       | 141.56           | 32.77             |
|                       | 132.89           | 32.56             |
|                       | 130.59           | 32.05             |
|                       | 129.96           |                   |
|                       | 129.59           |                   |
| 123.65                |                  |                   |
| <b>8<sup>3+</sup></b> | 166.30           | 36.84             |
|                       | 157.94           | 36.29             |
|                       | 152.67           | 34.65             |
|                       | 141.55           | 32.69             |
|                       | 132.87           | 32.50             |
|                       | 130.58           | 31.97             |
|                       | 129.97           |                   |
|                       | 129.59           |                   |
| 123.62                |                  |                   |



**Table S8** Electronic spectral data in CH<sub>3</sub>CN

| Complex                | $\lambda/\text{nm}$ ( $\epsilon / \text{M}^{-1} \text{cm}^{-1}$ ) |
|------------------------|-------------------------------------------------------------------|
| <b>2</b> <sup>2+</sup> | 384(2280), 315(4080), 307(4680), 278(13010), 240(6400)            |
| <b>3</b> <sup>+</sup>  | 408(1300), 316(2120), 283(12450), 241(7690)                       |
| <b>4</b> <sup>3+</sup> | 306(6490), 226(17580)                                             |
| <b>4</b> <sup>2+</sup> | 407(1790), 315(3400), 285(10760), 242(7260)                       |
| <b>5</b> <sup>+</sup>  | 534(4180), 367(4120), 316(8760)                                   |
| <b>6</b> <sup>2+</sup> | 480(5450), 369(7260), 306(6700), 278(7940)                        |
| <b>7</b> <sup>+</sup>  | 498(5190), 363(7160), 309(9330), 281(8360)                        |
| <b>8</b> <sup>3+</sup> | 444(2750), 358(4370), 311(4190), 275(4370)                        |
| <b>8</b> <sup>2+</sup> | 500(3260), 343(5590), 315(5920), 282(5090)                        |

**Table S9(a)** TD-DFT results for  $[\text{Ru}^{\text{II}}([\text{9}] \text{aneS}_3)(\text{bpy})(\text{NO}^+)]^{3+}$  ( $\mathbf{4}^{3+}$ )

| Excitation energy/eV | $\lambda/\text{nm}$ | $f$    | Transition                                                           | Character                                                                           |
|----------------------|---------------------|--------|----------------------------------------------------------------------|-------------------------------------------------------------------------------------|
| 3.09                 | 400.9               | 0.0048 | (64%)HOMO-2 $\rightarrow$ LUMO                                       | $\text{bpy}(\pi) \rightarrow \text{NO}(\pi^*)/\text{Ru}(\text{d}\pi)$               |
| 3.20                 | 387.3               | 0.0057 | (67%)HOMO-4 $\rightarrow$ LUMO                                       | $\text{L}(\pi)/\text{bpy}(\pi) \rightarrow \text{NO}(\pi^*)/\text{Ru}(\text{d}\pi)$ |
| 3.91                 | 317.1               | 0.0908 | (69%)HOMO $\rightarrow$ LUMO+4                                       | $\text{bpy}(\pi) \rightarrow \text{bpy}(\pi^*)$                                     |
| 4.04                 | 306.8               | 0.0316 | (53%)HOMO-4 $\rightarrow$ LUMO+2<br>(21%)HOMO-3 $\rightarrow$ LUMO+3 | $\text{L}(\pi)/\text{bpy}(\pi) \rightarrow \text{Ru}(\text{d}\pi)$                  |
| 4.47                 | 277.2               | 0.0305 | (45%)HOMO-5 $\rightarrow$ LUMO+4<br>(24%)HOMO-5 $\rightarrow$ LUMO+5 | $\text{bpy}(\pi) \rightarrow \text{bpy}(\pi^*)$                                     |
| 4.49                 | 275.9               | 0.0204 | (43%)HOMO-5 $\rightarrow$ LUMO+5<br>(23%)HOMO-5 $\rightarrow$ LUMO+4 | $\text{bpy}(\pi) \rightarrow \text{bpy}(\pi^*)$                                     |

**Table S9(b)** TD-DFT Results for  $[\text{Ru}^{\text{II}}([\text{9}] \text{aneS}_3)(\text{pap})(\text{NO}^+)]^{3+}$  ( $\mathbf{8}^{3+}$ )

| Excitation energy/ eV | $\lambda/\text{nm}$ | $f$    | Transition                                                           | Character                                                             |
|-----------------------|---------------------|--------|----------------------------------------------------------------------|-----------------------------------------------------------------------|
| 2.70                  | 459.2               | 0.0432 | (61%)HOMO-1 $\rightarrow$ LUMO+1<br>(21%)HOMO $\rightarrow$ LUMO     | $\text{pap}(\pi) \rightarrow \text{NO}(\pi^*)/\text{Ru}(\text{d}\pi)$ |
| 2.84                  | 435.6               | 0.0789 | (67%)HOMO-2 $\rightarrow$ LUMO                                       | $\text{pap}(\pi) \rightarrow \text{NO}(\pi^*)/\text{Ru}(\text{d}\pi)$ |
| 3.38                  | 366.9               | 0.0883 | (89%)HOMO $\rightarrow$ LUMO+4                                       | $\text{pap}(\pi) \rightarrow \text{pap}(\pi^*)$                       |
| 3.51                  | 352.8               | 0.0556 | (63%)HOMO-2 $\rightarrow$ LUMO+2                                     | $\text{pap}(\pi) \rightarrow \text{pap}(\pi^*)$                       |
| 4.23                  | 292.7               | 0.0913 | (45%)HOMO-7 $\rightarrow$ LUMO+2<br>(37%)HOMO-6 $\rightarrow$ LUMO+2 | $\text{pap}(\pi)/\text{L}(\pi) \rightarrow \text{pap}(\pi^*)$         |

**Table S10(a)** TD-DFT results for  $[\text{Ru}^{\text{II}}([\text{9}] \text{aneS}_3)(\text{bpy})(\text{NO}^\bullet)]^{2+}$  ( $4^{2+}$ )

| Excitation energy/eV | $\lambda/\text{nm}$ | $f$    | Transition                                                                                                         | Character                                                                                                      |
|----------------------|---------------------|--------|--------------------------------------------------------------------------------------------------------------------|----------------------------------------------------------------------------------------------------------------|
| 2.76                 | 448.8               | 0.0016 | (37%)HOMO-3( $\alpha$ ) $\rightarrow$ LUMO( $\alpha$ )<br>(47%)HOMO-2( $\beta$ ) $\rightarrow$ LUMO+1( $\beta$ )   | Ru(d $\pi$ )/bpy( $\pi$ ) $\rightarrow$ NO( $\pi^*$ )                                                          |
| 2.92                 | 424.6               | 0.0045 | (56%)HOMO-1( $\alpha$ ) $\rightarrow$ LUMO+1( $\alpha$ )                                                           | bpy( $\pi$ ) $\rightarrow$ bpy( $\pi^*$ )                                                                      |
| 3.02                 | 410.2               | 0.0105 | (60%)HOMO( $\beta$ ) $\rightarrow$ LUMO+2( $\beta$ )                                                               | Ru(d $\pi$ ) $\rightarrow$ bpy( $\pi^*$ )                                                                      |
| 3.40                 | 364.1               | 0.0090 | (62%)HOMO-3( $\beta$ ) $\rightarrow$ LUMO+2( $\beta$ )                                                             | Ru(d $\pi$ ) $\rightarrow$ bpy( $\pi^*$ )                                                                      |
| 3.46                 | 357.9               | 0.0102 | (53%)HOMO-3( $\alpha$ ) $\rightarrow$ LUMO+1( $\alpha$ )                                                           | Ru(d $\pi$ )/bpy( $\pi$ ) $\rightarrow$ bpy( $\pi^*$ )                                                         |
| 3.72                 | 333.0               | 0.0245 | (29%)HOMO-4( $\alpha$ ) $\rightarrow$ LUMO+1( $\alpha$ )<br>(28%)HOMO-4( $\beta$ ) $\rightarrow$ LUMO+2( $\beta$ ) | Ru(d $\pi$ )/bpy( $\pi$ ) $\rightarrow$ bpy( $\pi^*$ )<br>L( $\pi$ )/bpy( $\pi$ ) $\rightarrow$ bpy( $\pi^*$ ) |
| 3.89                 | 318.5               | 0.0239 | (82%)HOMO-2( $\beta$ ) $\rightarrow$ LUMO+4( $\beta$ )                                                             | Ru(d $\pi$ )/bpy( $\pi$ ) $\rightarrow$ bpy( $\pi^*$ )                                                         |
| 4.26                 | 290.8               | 0.0451 | (37%)HOMO-7( $\alpha$ ) $\rightarrow$ LUMO+1( $\alpha$ )<br>(25%)HOMO-6( $\beta$ ) $\rightarrow$ LUMO+2( $\beta$ ) | bpy( $\pi$ ) $\rightarrow$ bpy( $\pi^*$ )                                                                      |
| 4.42                 | 280.1               | 0.0637 | (43%)HOMO-6( $\beta$ ) $\rightarrow$ LUMO+2( $\beta$ )<br>(21%)HOMO-7( $\alpha$ ) $\rightarrow$ LUMO+1( $\alpha$ ) | bpy( $\pi$ ) $\rightarrow$ bpy( $\pi^*$ )                                                                      |

**Table S10(b)** TD-DFT results for  $[\text{Ru}^{\text{II}}([\text{9}] \text{aneS}_3)(\text{pap})(\text{NO}^\bullet)]^{2+}$  ( $8^{2+}$ )

| Excitation energy/eV | $\lambda/\text{nm}$ | $f$    | Transition                                                                                                         | Character                                                                             |
|----------------------|---------------------|--------|--------------------------------------------------------------------------------------------------------------------|---------------------------------------------------------------------------------------|
| 2.30                 | 538.5               | 0.0066 | (69%)SOMO( $\alpha$ ) $\rightarrow$ LUMO( $\alpha$ )                                                               | Ru(d $\pi$ )/NO( $\pi^*$ ) $\rightarrow$ pap( $\pi^*$ )                               |
| 2.55                 | 486.5               | 0.0159 | (43%)HOMO-3( $\alpha$ ) $\rightarrow$ LUMO( $\alpha$ )<br>(26%)HOMO-3( $\alpha$ ) $\rightarrow$ LUMO+1( $\alpha$ ) | Ru(d $\pi$ ) $\rightarrow$ pap( $\pi^*$ )<br>Ru(d $\pi$ ) $\rightarrow$ NO( $\pi^*$ ) |
| 3.71                 | 334.0               | 0.0583 | (47%)HOMO-5( $\beta$ ) $\rightarrow$ LUMO( $\beta$ )<br>(28%)HOMO-6( $\alpha$ ) $\rightarrow$ LUMO( $\alpha$ )     | pap( $\pi$ ) $\rightarrow$ pap( $\pi^*$ )                                             |
| 3.94                 | 314.5               | 0.0026 | (51%)HOMO-6( $\beta$ ) $\rightarrow$ LUMO( $\beta$ )<br>(32%)HOMO-8( $\alpha$ ) $\rightarrow$ LUMO( $\alpha$ )     | pap( $\pi$ )/L( $\pi$ ) $\rightarrow$ pap( $\pi^*$ )                                  |

**Table S11** Redox potential data<sup>a</sup>

| Complex               | Ru <sup>III</sup> / Ru <sup>II</sup> | $E_{298}^{\circ}/V$ ( $\Delta E_p/mV$ )  |                                           |                                                       |
|-----------------------|--------------------------------------|------------------------------------------|-------------------------------------------|-------------------------------------------------------|
|                       |                                      | NO <sup>+</sup> → NO <sup>•</sup><br>(I) | NO <sup>•</sup> → NO <sup>-</sup><br>(II) | Ligand reduction                                      |
| <b>2<sup>2+</sup></b> | 1.61(70)                             | –                                        | –                                         | -1.41(70), -1.57(70)                                  |
| <b>3<sup>+</sup></b>  | 1.31 <sup>b</sup>                    | –                                        | –                                         | -1.55(70), -1.79(70),                                 |
| <b>4<sup>3+</sup></b> | >2                                   | 0.49(90)                                 | 0.07 <sup>b</sup>                         | -1.01 <sup>b</sup> , -1.52(70)                        |
| <b>5<sup>+</sup></b>  | 1.34(80)                             | –                                        | –                                         | -0.74(80), -1.30(120),<br>-1.51(70)                   |
| <b>6<sup>2+</sup></b> | 1.86(90)                             | –                                        | –                                         | -0.49(70), -1.16(130),<br>-1.50(70)                   |
| <b>7<sup>+</sup></b>  | 1.68 <sup>b</sup>                    | –                                        | –                                         | -0.52(70), -1.31 <sup>b</sup> ,<br>-1.39 <sup>b</sup> |
| <b>8<sup>3+</sup></b> | >2                                   | 0.67(90)                                 | 0.03 <sup>b</sup>                         | -0.44 <sup>b</sup> , -0.53(60),<br>-0.71(60)          |

<sup>a</sup>Potentials with reference to SCE; in CH<sub>3</sub>CN/0.1 M Et<sub>4</sub>NClO<sub>4</sub>; scan rate, 100 mV s<sup>-1</sup>.

<sup>b</sup>Irreversible.

**Table S12** MO composition of  $4^{3+}$

| MO      | Energy/<br>eV | Composition |     |                      |    |
|---------|---------------|-------------|-----|----------------------|----|
|         |               | Ru          | bpy | [9]aneS <sub>3</sub> | NO |
| LUMO+5  | -10.65        | 02          | 91  | 07                   | 0  |
| LUMO+4  | -11.72        | 05          | 92  | 02                   | 01 |
| LUMO+3  | -12.18        | 50          | 22  | 28                   | 0  |
| LUMO+2  | -12.28        | 49          | 12  | 30                   | 09 |
| LUMO+1  | -13.41        | 22          | 02  | 04                   | 72 |
| LUMO    | -13.41        | 24          | 02  | 04                   | 70 |
| HOMO    | -16.39        | 01          | 99  | 0                    | 0  |
| HOMO-1  | -17.49        | 21          | 55  | 18                   | 06 |
| HOMO-2  | -17.58        | 07          | 85  | 03                   | 05 |
| HOMO-3  | -17.83        | 30          | 25  | 44                   | 01 |
| HOMO-4  | -17.92        | 19          | 20  | 55                   | 06 |
| HOMO-5  | -17.94        | 02          | 74  | 23                   | 01 |
| HOMO-6  | -18.25        | 10          | 27  | 62                   | 01 |
| HOMO-7  | -18.46        | 42          | 22  | 31                   | 05 |
| HOMO-8  | -18.94        | 14          | 58  | 27                   | 01 |
| HOMO-9  | -19.21        | 46          | 21  | 18                   | 15 |
| HOMO-10 | -19.28        | 28          | 49  | 19                   | 04 |

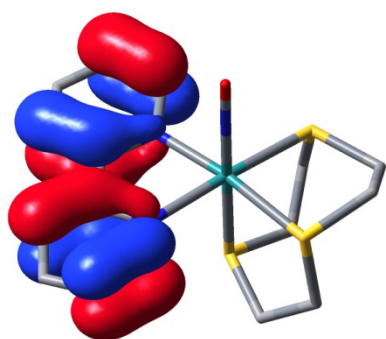

**HOMO**

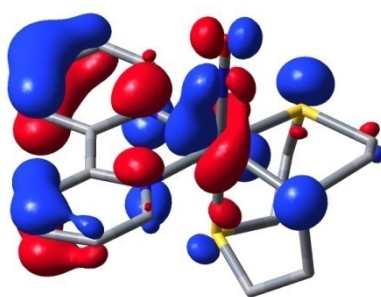

**HOMO-1**

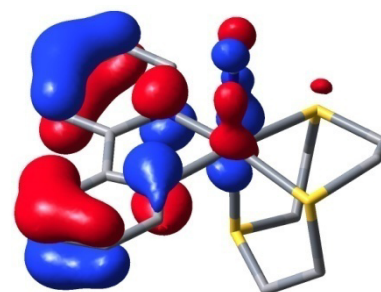

**HOMO-2**

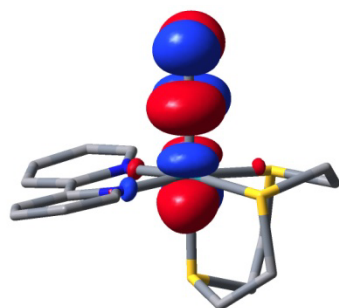

**LUMO**

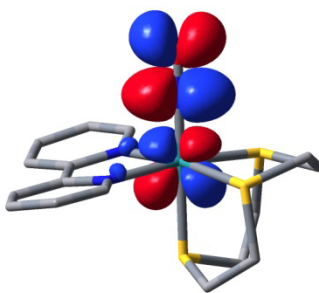

**LUMO+1**

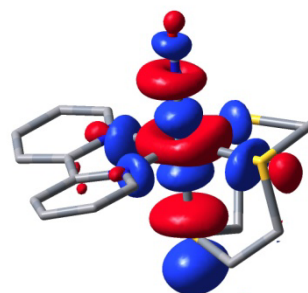

**LUMO+2**

**Table S13** MO composition of  $\mathbf{8}^{3+}$

| MO      | Energy/<br>eV | Composition |     |                      |    |
|---------|---------------|-------------|-----|----------------------|----|
|         |               | Ru          | pap | [9]aneS <sub>3</sub> | NO |
| LUMO+5  | -10.72        | 50          | 18  | 28                   | 04 |
| LUMO+4  | -12.18        | 02          | 94  | 04                   | 0  |
| LUMO+3  | -12.32        | 49          | 17  | 29                   | 05 |
| LUMO+2  | -12.73        | 08          | 86  | 03                   | 03 |
| LUMO+1  | -13.43        | 23          | 02  | 04                   | 71 |
| LUMO    | -13.46        | 19          | 10  | 03                   | 68 |
| HOMO    | -15.62        | 01          | 99  | 0                    | 0  |
| HOMO-1  | -15.76        | 01          | 98  | 01                   | 0  |
| HOMO-2  | -17.27        | 04          | 86  | 10                   | 0  |
| HOMO-3  | -17.43        | 06          | 70  | 21                   | 03 |
| HOMO-4  | -17.56        | 19          | 55  | 20                   | 06 |
| HOMO-5  | -17.81        | 25          | 39  | 35                   | 01 |
| HOMO-6  | -18.02        | 22          | 17  | 57                   | 04 |
| HOMO-7  | -18.21        | 03          | 81  | 15                   | 01 |
| HOMO-8  | -18.26        | 13          | 31  | 52                   | 04 |
| HOMO-9  | -18.46        | 02          | 92  | 05                   | 01 |
| HOMO-10 | -18.58        | 35          | 34  | 27                   | 04 |

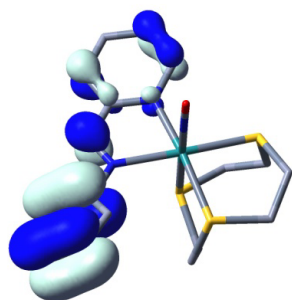

**HOMO**

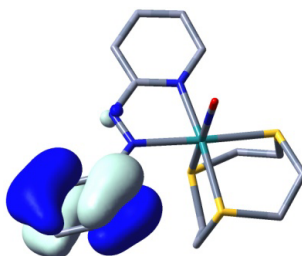

**HOMO-1**

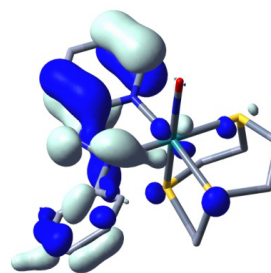

**HOMO-2**

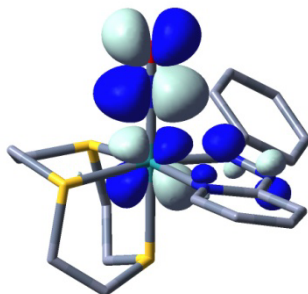

**LUMO**

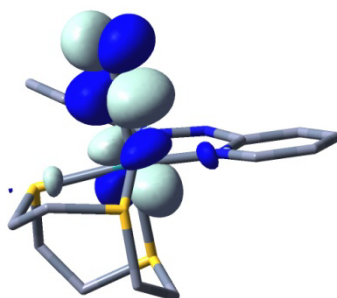

**LUMO+1**

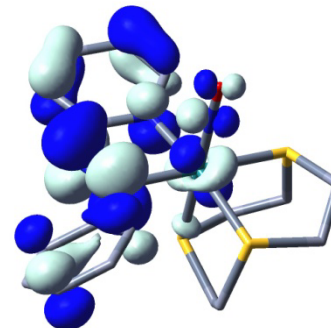

**LUMO+2**

**Table S14a** MO composition of  $4^{2+}$

| MO     | Energy/<br>eV | $\alpha$ -spin |     |                      |    |
|--------|---------------|----------------|-----|----------------------|----|
|        |               | Composition    |     |                      |    |
|        |               | Ru             | bpy | [9]aneS <sub>3</sub> | NO |
| LUMO+5 | -7.17         | 19             | 65  | 09                   | 07 |
| LUMO+4 | -7.22         | 26             | 50  | 15                   | 09 |
| LUMO+3 | -7.35         | 09             | 81  | 07                   | 03 |
| LUMO+2 | -7.62         | 52             | 18  | 30                   | 0  |
| LUMO+1 | -8.33         | 03             | 96  | 01                   | 0  |
| LUMO   | -8.96         | 17             | 01  | 04                   | 78 |
| SOMO   | -12.03        | 30             | 05  | 12                   | 53 |
| HOMO-1 | -13.06        | 04             | 95  | 01                   | 0  |
| HOMO-2 | -13.21        | 70             | 05  | 20                   | 05 |
| HOMO-3 | -13.41        | 52             | 24  | 11                   | 13 |
| HOMO-4 | -13.73        | 51             | 18  | 07                   | 24 |
| HOMO-5 | -14.27        | 05             | 32  | 63                   | 0  |

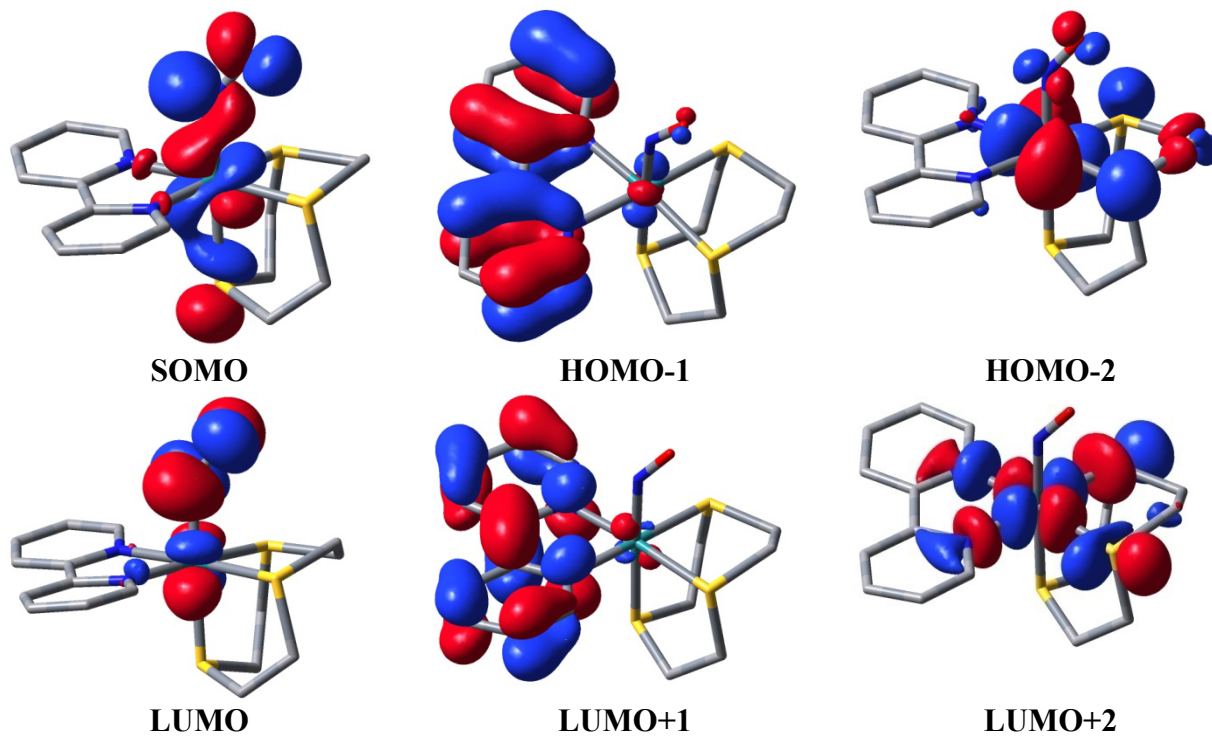

**Table S14b** MO composition of  $4^{2+}$

| MO     | Energy/<br>eV | $\beta$ -spin |     |                      |    |
|--------|---------------|---------------|-----|----------------------|----|
|        |               | Composition   |     |                      |    |
|        |               | Ru            | bpy | [9]aneS <sub>3</sub> | NO |
| LUMO+5 | -7.19         | 02            | 95  | 03                   | 0  |
| LUMO+4 | -7.32         | 02            | 96  | 02                   | 0  |
| LUMO+3 | -7.57         | 52            | 18  | 30                   | 0  |
| LUMO+2 | -8.30         | 04            | 93  | 02                   | 01 |
| LUMO+1 | -8.58         | 14            | 04  | 04                   | 78 |
| LUMO   | -8.97         | 28            | 06  | 12                   | 54 |
| HOMO   | -13.02        | 62            | 14  | 19                   | 05 |
| HOMO-1 | -13.05        | 07            | 90  | 02                   | 01 |
| HOMO-2 | -13.36        | 63            | 17  | 12                   | 08 |
| HOMO-3 | -13.37        | 70            | 13  | 10                   | 07 |
| HOMO-4 | -14.27        | 05            | 33  | 62                   | 0  |
| HOMO-5 | -14.35        | 10            | 14  | 74                   | 02 |

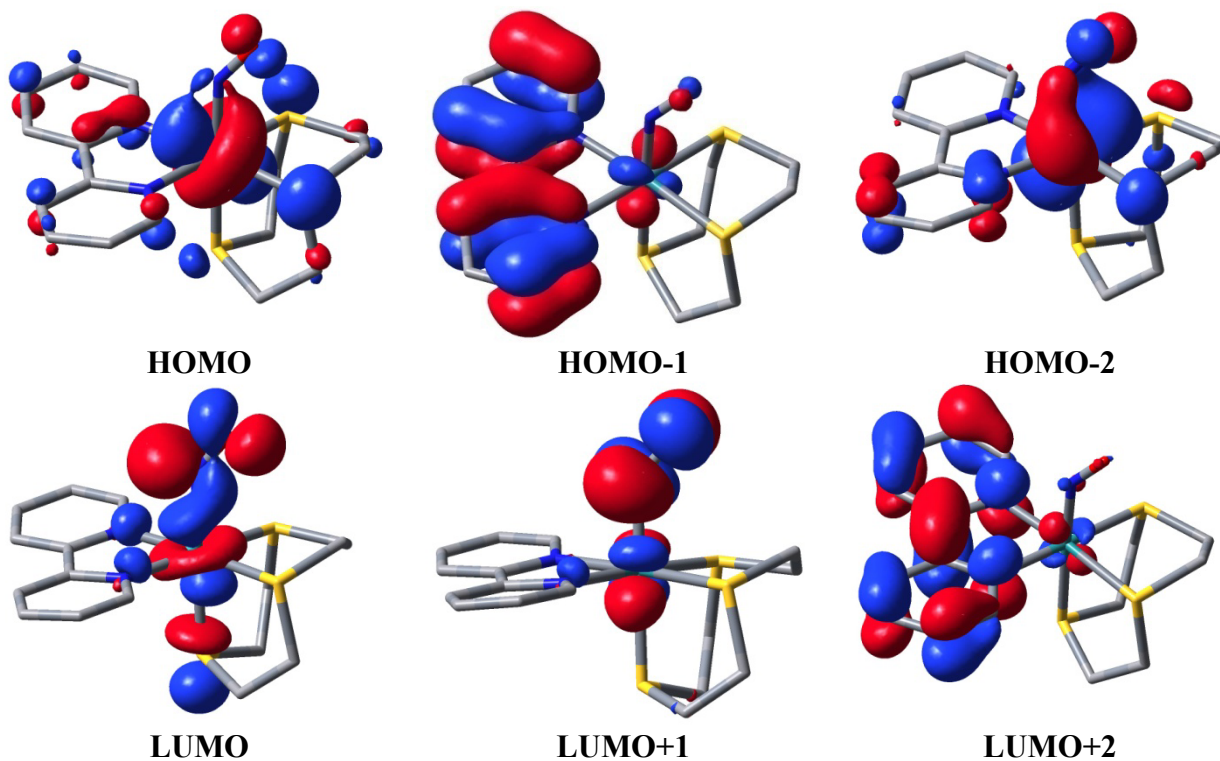



**Table S15a.** MO composition of  $8^{2+}$

| MO     | Energy/<br>eV | $\alpha$ -spin |     |                      |    |
|--------|---------------|----------------|-----|----------------------|----|
|        |               | Composition    |     |                      |    |
|        |               | Ru             | pap | [9]aneS <sub>3</sub> | NO |
| LUMO+5 | -6.59         | 12             | 18  | 70                   | 0  |
| LUMO+4 | -7.28         | 49             | 10  | 24                   | 17 |
| LUMO+3 | -7.41         | 04             | 92  | 03                   | 01 |
| LUMO+2 | -7.79         | 52             | 18  | 29                   | 01 |
| LUMO+1 | -8.96         | 19             | 19  | 02                   | 60 |
| LUMO   | -9.39         | 02             | 77  | 01                   | 20 |
| SOMO   | -12.20        | 31             | 07  | 12                   | 50 |
| HOMO-1 | -12.54        | 02             | 93  | 01                   | 04 |
| HOMO-2 | -12.70        | 01             | 98  | 01                   | 0  |
| HOMO-3 | -13.30        | 62             | 13  | 20                   | 05 |
| HOMO-4 | -13.58        | 52             | 14  | 23                   | 11 |
| HOMO-5 | -13.73        | 46             | 28  | 09                   | 17 |

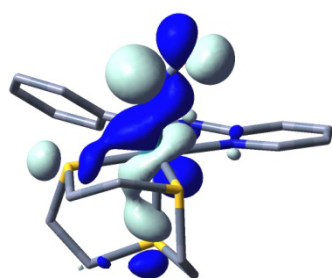

**SOMO**

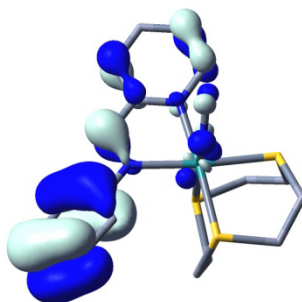

**HOMO-1**

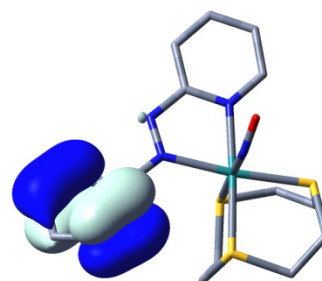

**HOMO-2**

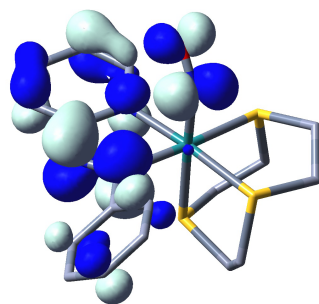

**LUMO**

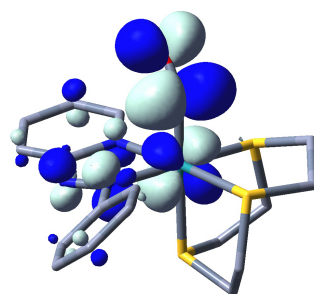

**LUMO+1**

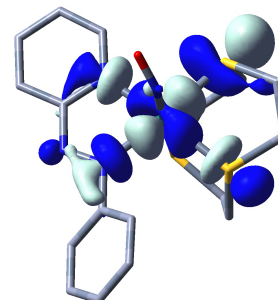

**LUMO+2**

**Table S15b** MO composition of  $\mathbf{8}^{2+}$

| MO     | Energy/<br>eV | $\beta$ -spin |     |                      |    |
|--------|---------------|---------------|-----|----------------------|----|
|        |               | Composition   |     |                      |    |
|        |               | Ru            | pap | [9]aneS <sub>3</sub> | NO |
| LUMO+5 | -6.74         | 34            | 06  | 28                   | 32 |
| LUMO+4 | -7.40         | 02            | 96  | 02                   | 0  |
| LUMO+3 | -7.72         | 52            | 18  | 29                   | 01 |
| LUMO+2 | -8.63         | 17            | 05  | 02                   | 76 |
| LUMO+1 | -9.13         | 02            | 90  | 01                   | 07 |
| LUMO   | -9.33         | 30            | 03  | 13                   | 54 |
| HOMO   | -12.52        | 04            | 95  | 01                   | 0  |
| HOMO-1 | -12.70        | 01            | 98  | 01                   | 0  |
| HOMO-2 | -13.14        | 57            | 17  | 20                   | 06 |
| HOMO-3 | -13.32        | 73            | 10  | 14                   | 03 |
| HOMO-4 | -13.63        | 55            | 21  | 15                   | 09 |
| HOMO-5 | -13.91        | 06            | 65  | 26                   | 03 |

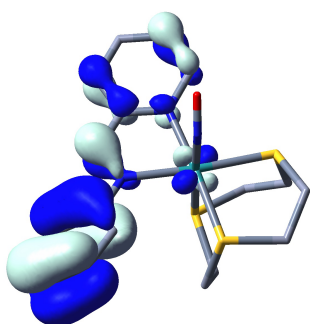

**HOMO**

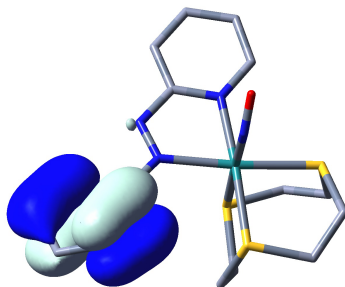

**HOMO-1**

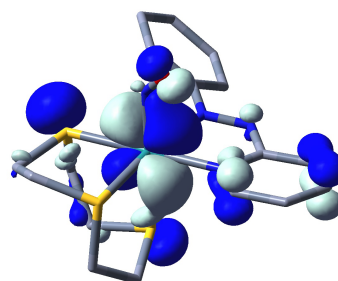

**HOMO-2**

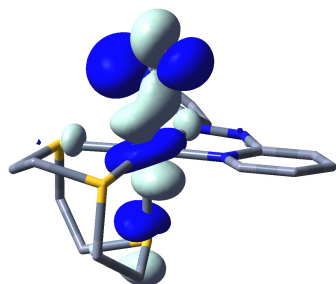

**LUMO**

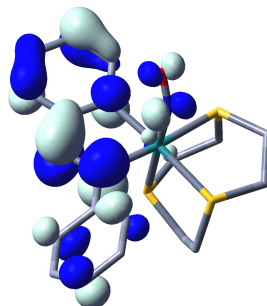

**LUMO+1**

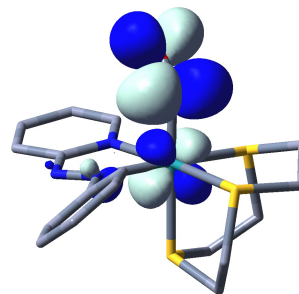

**LUMO+2**

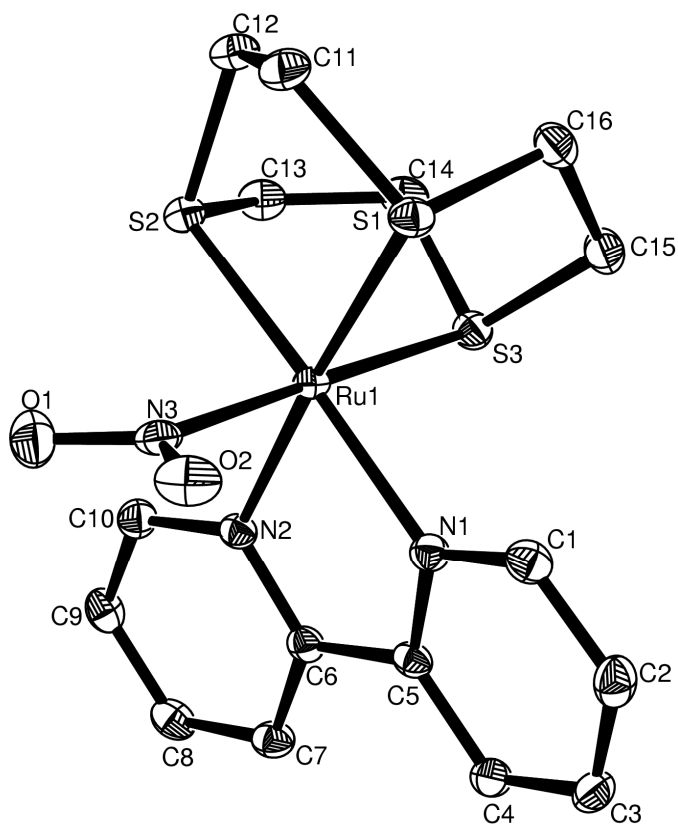

**Fig. S1** Molecular structure of the cation of  $[\text{Ru}^{\text{II}}([\text{9}]\text{aneS}_3)(\text{bpy})(\text{NO}_2)](\text{ClO}_4)$  in the crystal structure of **[3]**( $\text{ClO}_4$ ). Ellipsoids are drawn at 50% probability. Hydrogen atoms are omitted for clarity.

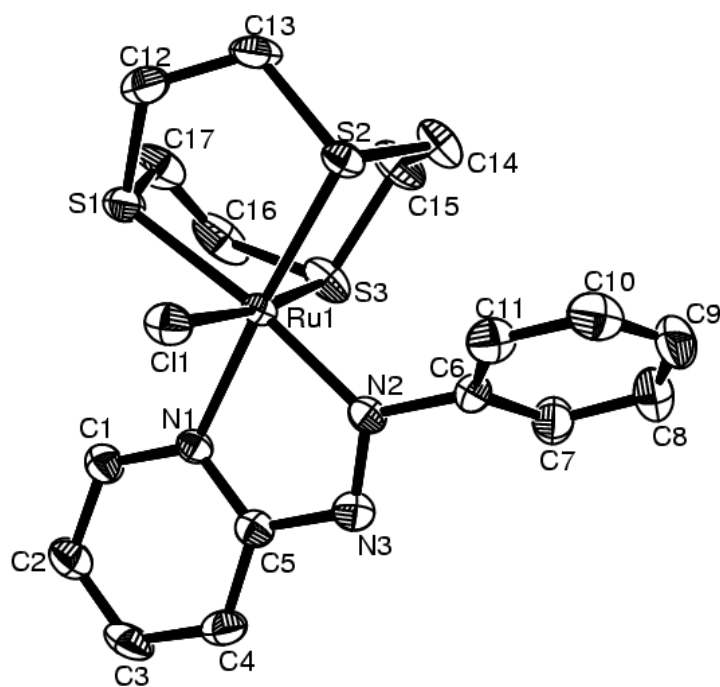

**Fig. S2** Molecular structure of the cation of  $[\text{Ru}^{\text{II}}([\text{9}]\text{aneS}_3)(\text{pap})(\text{Cl})](\text{ClO}_4)$  in the crystal structure of **[5]**(ClO<sub>4</sub>). Ellipsoids are drawn at 50% probability. Hydrogen atoms are omitted for clarity.

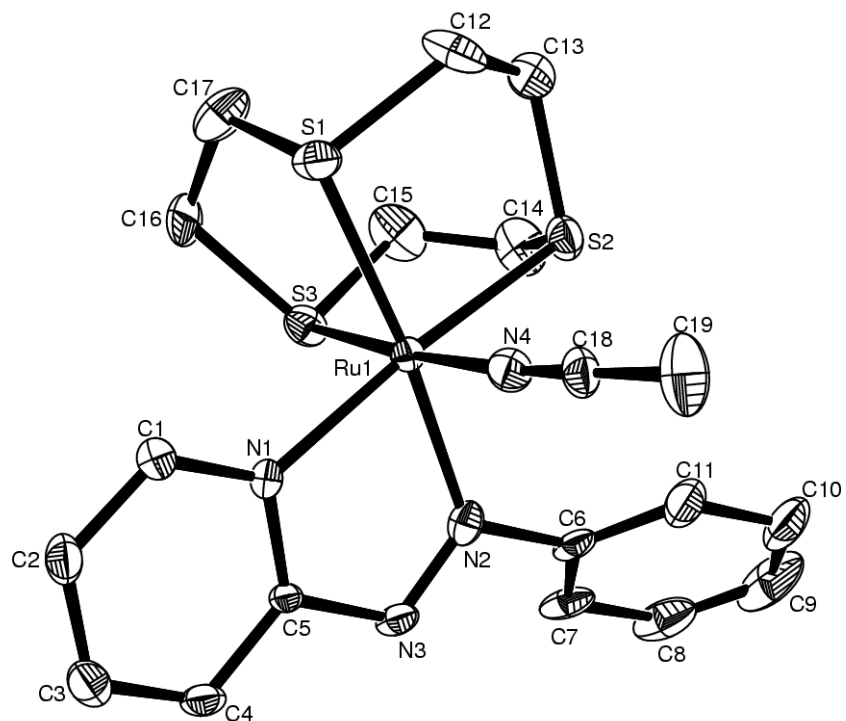

**Fig. S3** Molecular structure of the cation of  $[\text{Ru}^{\text{II}}([\text{9}]\text{aneS}_3)(\text{pap})(\text{CH}_3\text{CN})](\text{ClO}_4)_2$  in the crystal structure of  $[\mathbf{6}](\text{ClO}_4)_2$ . Ellipsoids are drawn at 50% probability. Hydrogen atoms are omitted for clarity.

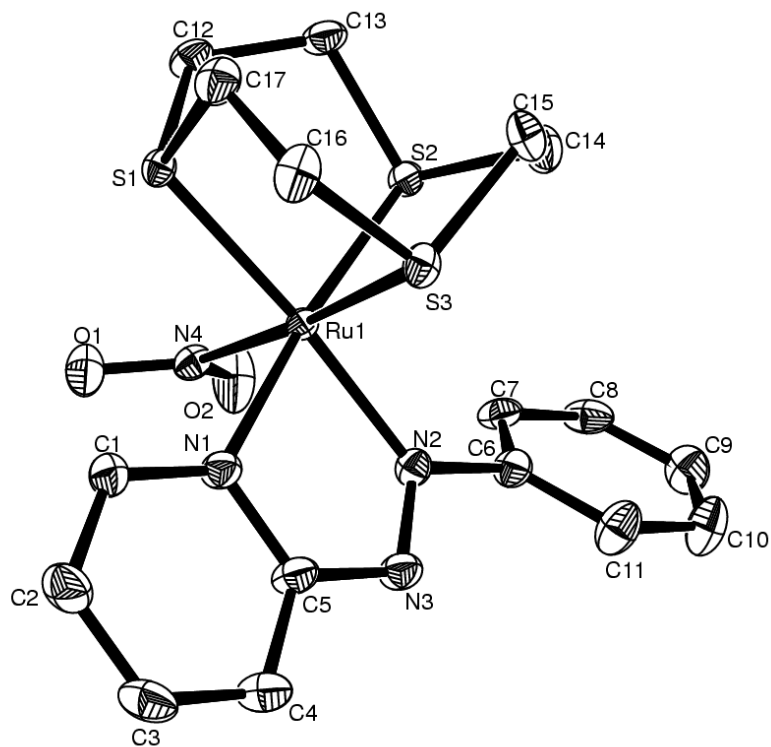

**Fig. S4** Molecular structure of the cation of [Ru<sup>II</sup>([9]aneS<sub>3</sub>)(pap)(NO<sub>2</sub>)](ClO<sub>4</sub>) in the crystal structure of [7](ClO<sub>4</sub>). Ellipsoids are drawn at 50% probability. Hydrogen atoms are omitted for clarity.

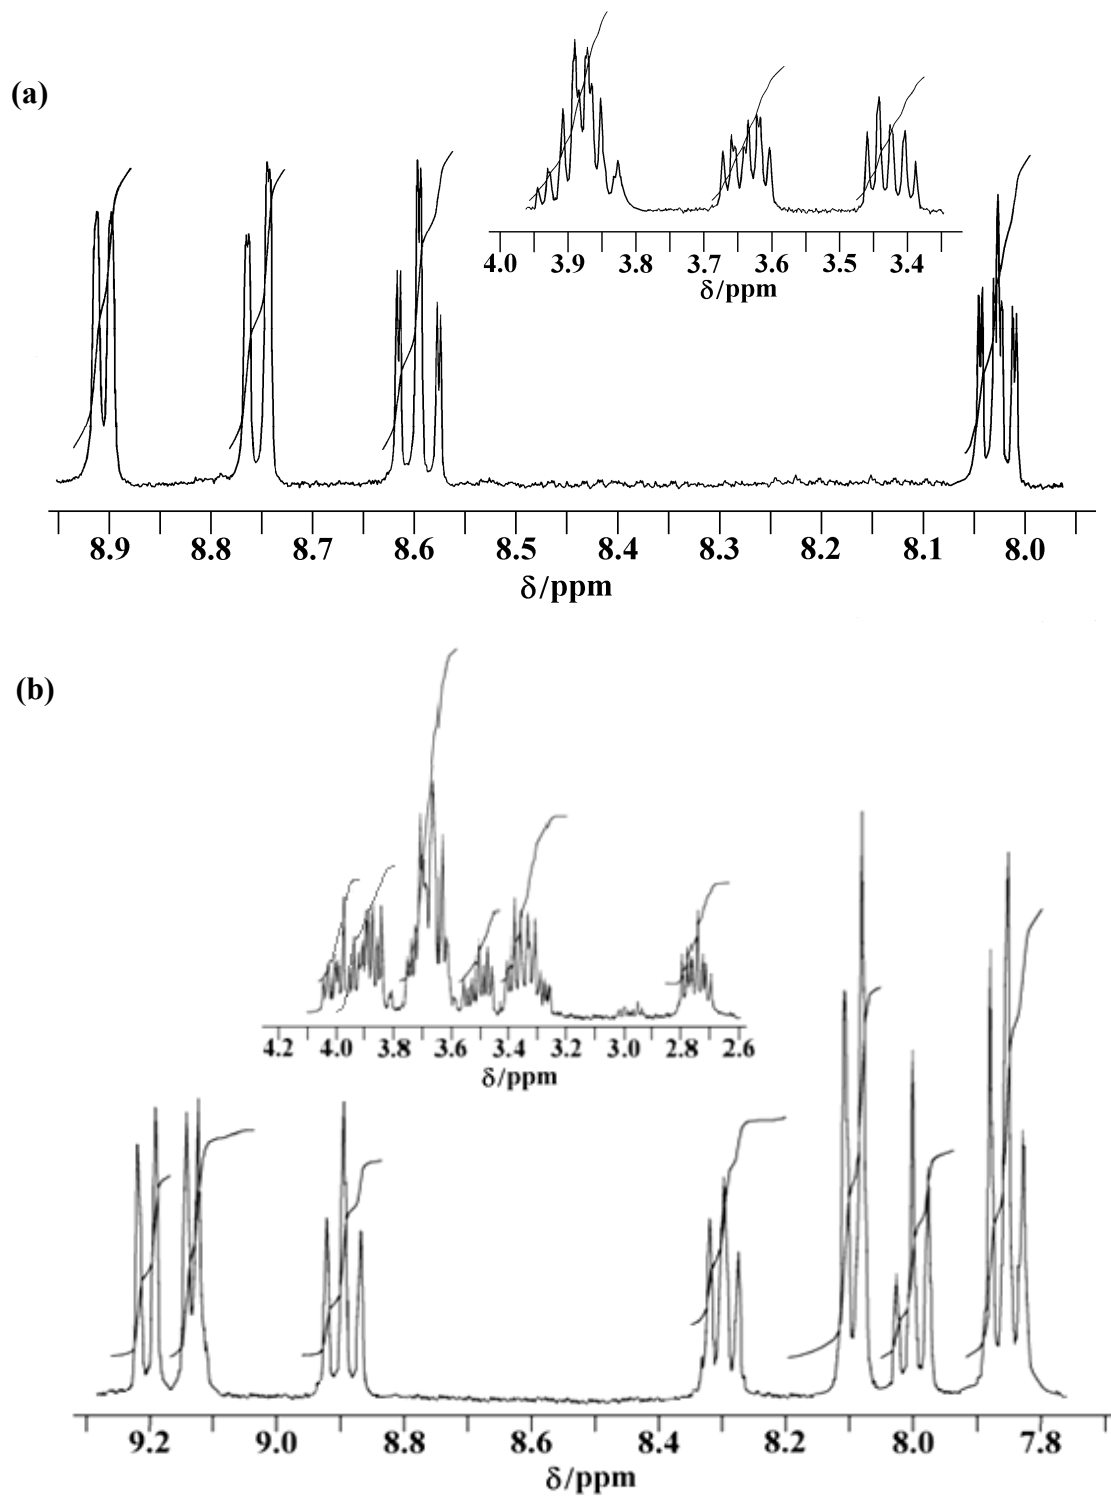

**Fig. S5**  $^1\text{H}$  NMR spectra in  $\text{CD}_3\text{CN}$  of (a)  $[\text{Ru}^{\text{II}}([\text{9}]\text{aneS}_3)(\text{bpy})(\text{NO})]^{3+}$  ( $\mathbf{4}^{3+}$ ) and (b)  $[\text{Ru}^{\text{II}}([\text{9}]\text{aneS}_3)(\text{pap})(\text{NO})]^{3+}$  ( $\mathbf{8}^{3+}$ ).

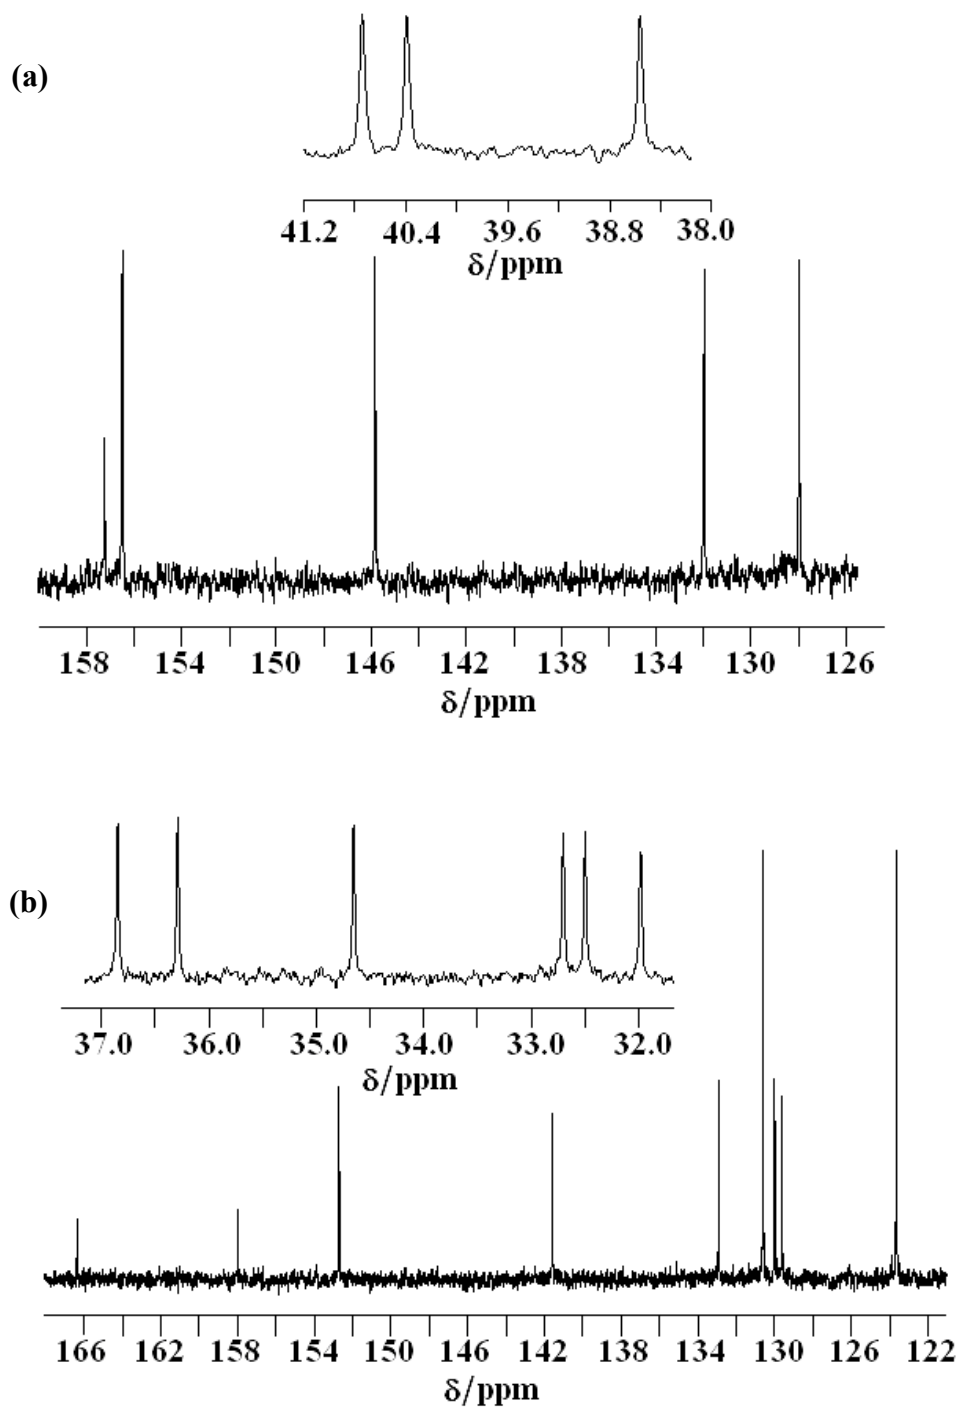

**Fig. S6**  $^{13}\text{C}$  NMR spectra in  $\text{CD}_3\text{CN}$  of (a)  $[\text{Ru}^{\text{II}}([\text{9}]\text{aneS}_3)(\text{bpy})(\text{NO})]^{3+}$  ( $\mathbf{4}^{3+}$ ) and (b)  $[\text{Ru}^{\text{II}}([\text{9}]\text{aneS}_3)(\text{pap})(\text{NO})]^{3+}$  ( $\mathbf{8}^{3+}$ ).



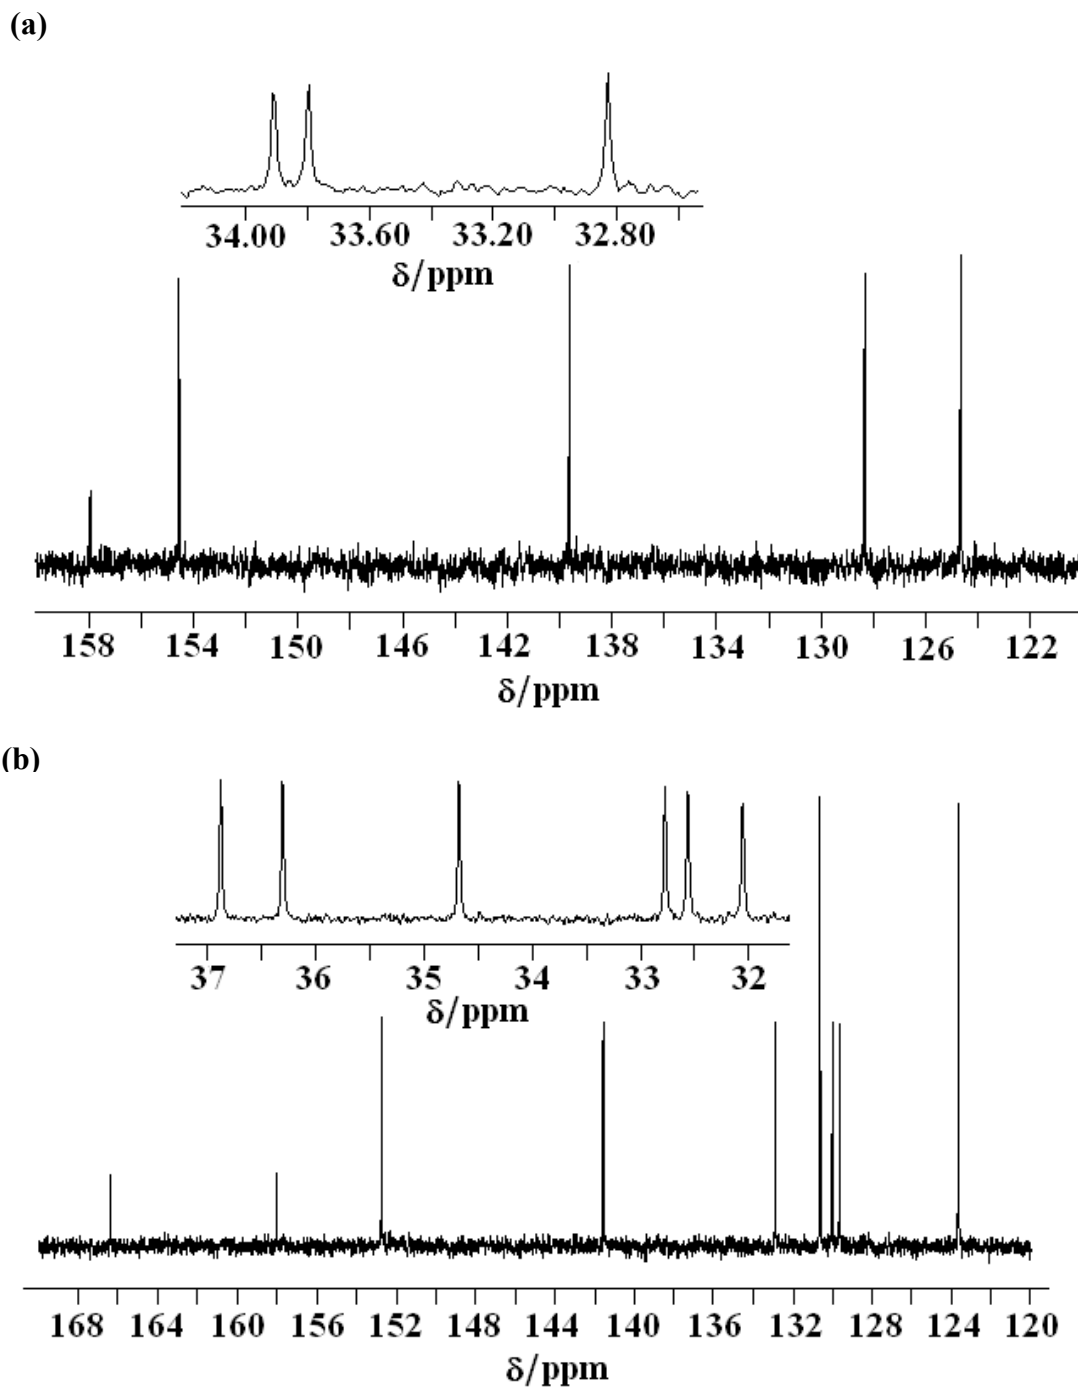

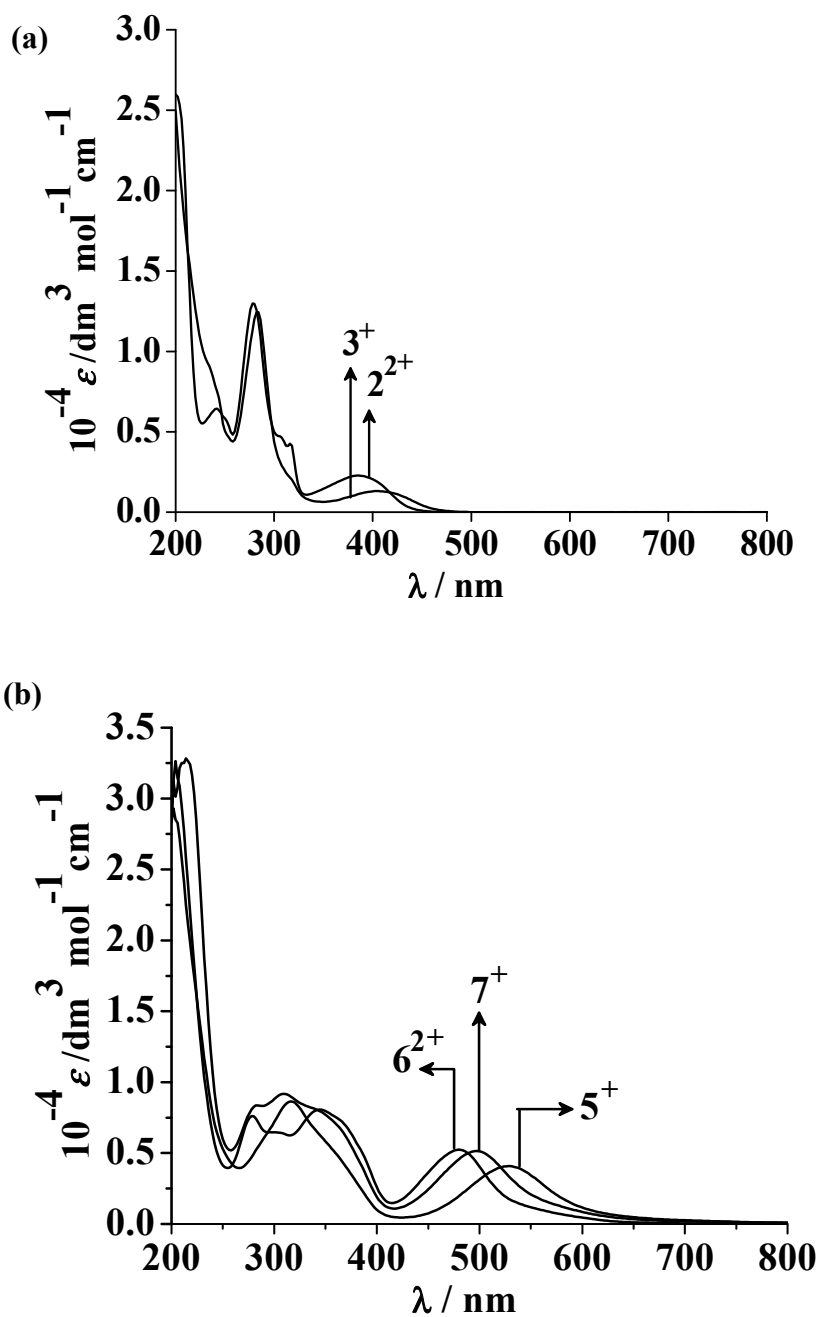

**Fig. S8** Electronic spectra in CH<sub>3</sub>CN of (a)  $[\text{Ru}^{\text{II}}([\text{9}] \text{aneS}_3)(\text{bpy})(\text{CH}_3\text{CN})]^{2+}$  ( $2^{2+}$ ),  $[\text{Ru}^{\text{II}}([\text{9}] \text{aneS}_3)(\text{bpy})(\text{NO}_2)]^+$  ( $3^+$ ) and (b)  $[\text{Ru}^{\text{II}}([\text{9}] \text{aneS}_3)(\text{pap})(\text{Cl})]^+$  ( $5^+$ ),  $[\text{Ru}^{\text{II}}([\text{9}] \text{aneS}_3)(\text{pap})(\text{CH}_3\text{CN})]^{2+}$  ( $6^{2+}$ ),  $[\text{Ru}^{\text{II}}([\text{9}] \text{aneS}_3)(\text{pap})(\text{NO}_2)]^+$  ( $7^+$ ).

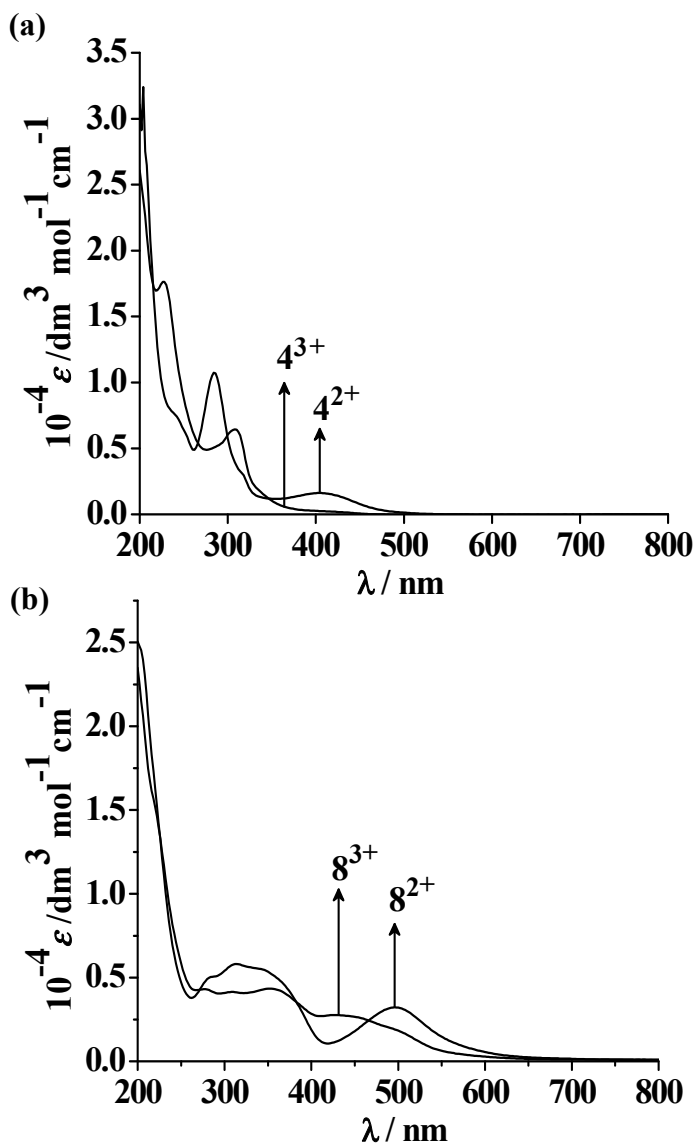

**Fig. S9** Electronic spectra in CH<sub>3</sub>CN of (a)  $[\text{Ru}^{\text{II}}([\text{9}] \text{aneS}_3)(\text{bpy})(\text{NO})]^{3+}$  ( $\mathbf{4}^{3+}$ ),  $[\text{Ru}^{\text{II}}([\text{9}] \text{aneS}_3)(\text{bpy})(\text{NO})]^{2+}$  ( $\mathbf{4}^{2+}$ ) and (b)  $[\text{Ru}^{\text{II}}([\text{9}] \text{aneS}_3)(\text{pap})(\text{NO})]^{3+}$  ( $\mathbf{8}^{3+}$ ),  $[\text{Ru}^{\text{II}}([\text{9}] \text{aneS}_3)(\text{pap})(\text{NO})]^{2+}$  ( $\mathbf{8}^{2+}$ ).

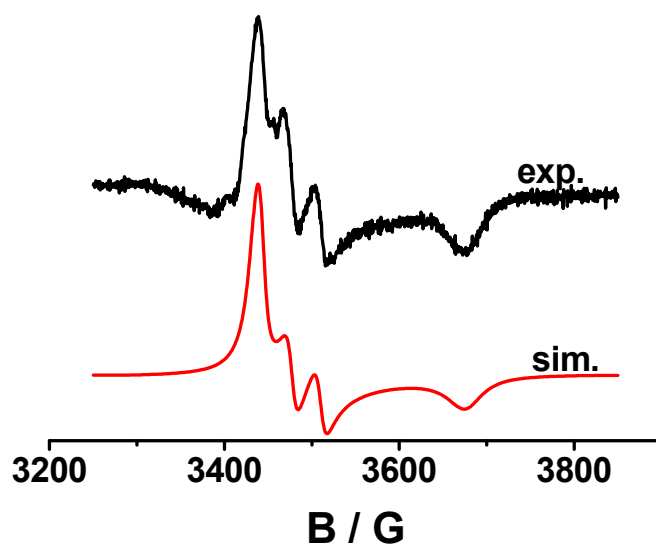

**Fig. S10** EPR spectra of  $[\text{Ru}^{\text{II}}([\text{9}]\text{aneS}_3)(\text{bpy})(\text{NO})]^{2+}$  ( $4^{2+}$ ) in  $\text{CH}_3\text{CN}$  at 110 K.
